# Supplementary material for: Red-emitting ionic fluorophores: anion-dependent tunable fluorescence, chlorinated solvent sensing, white light emission and latent fingerprinting
Source: Royal Society of Chemistry journal article supplement (doi:10.1039/d4tc01909a), 2024-01-01
Supplement: d4tc01909a1.pdf [file d4tc01909a1.pdf]

## Supplementary Information

**Red emitting ionic fluorophores: Anion dependent tunable fluorescence, chlorinated solvent sensing, white light emission and latent fingerprinting**

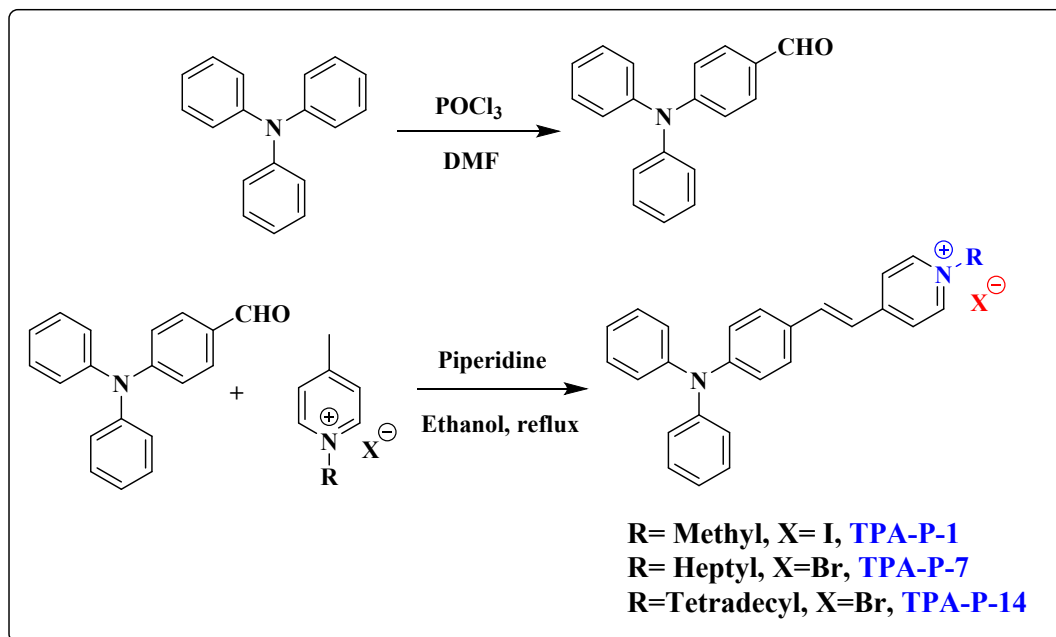

**Scheme S1.** Synthesis of (E)-4-(4-(diphenylamino)styryl)-1-alkylpyridin-1-ium salts

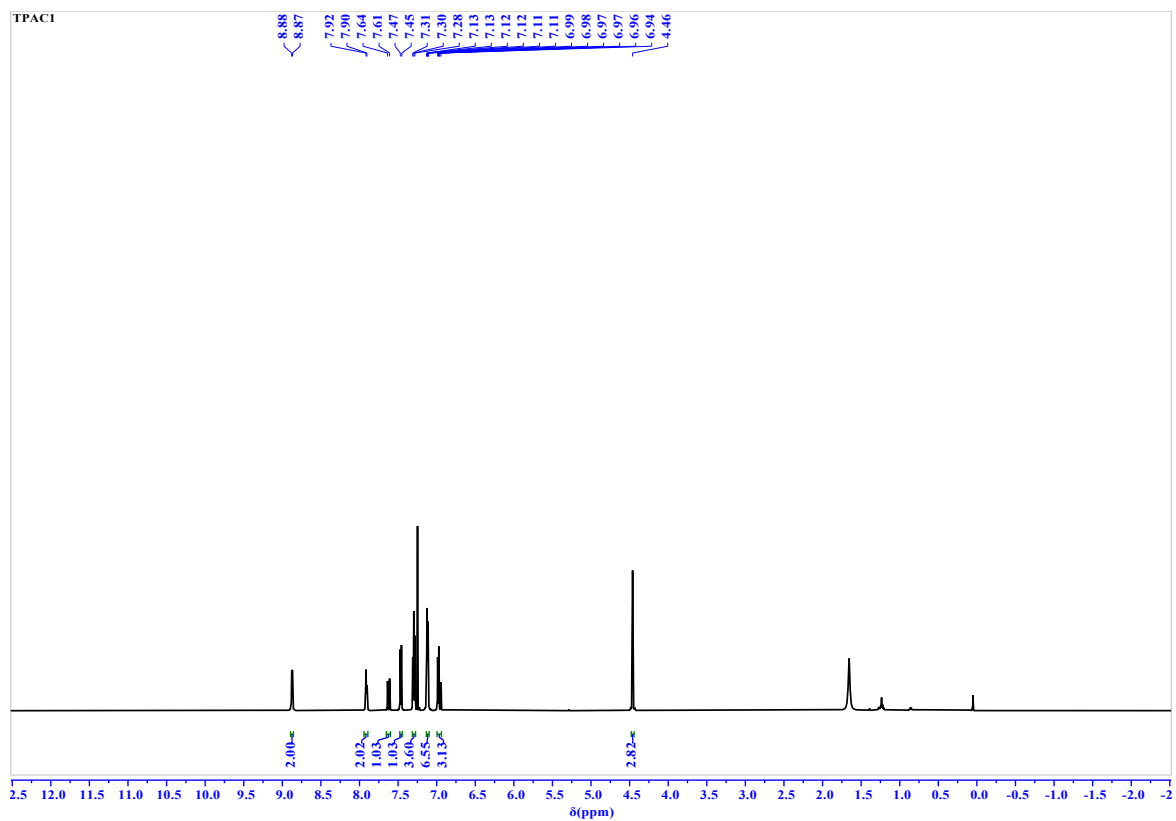

$^1\text{H}$  NMR spectra of TPA-P-1

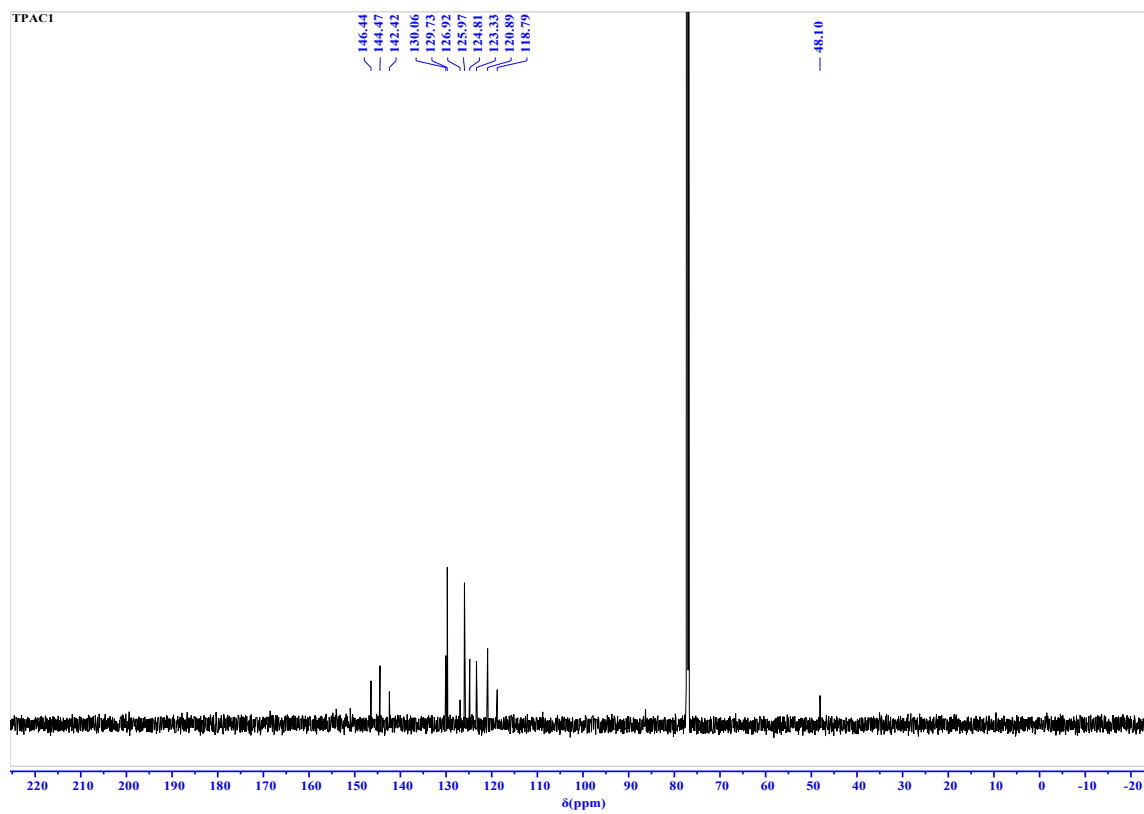

$^{13}\text{C}$  NMR spectra of TPA-P-1

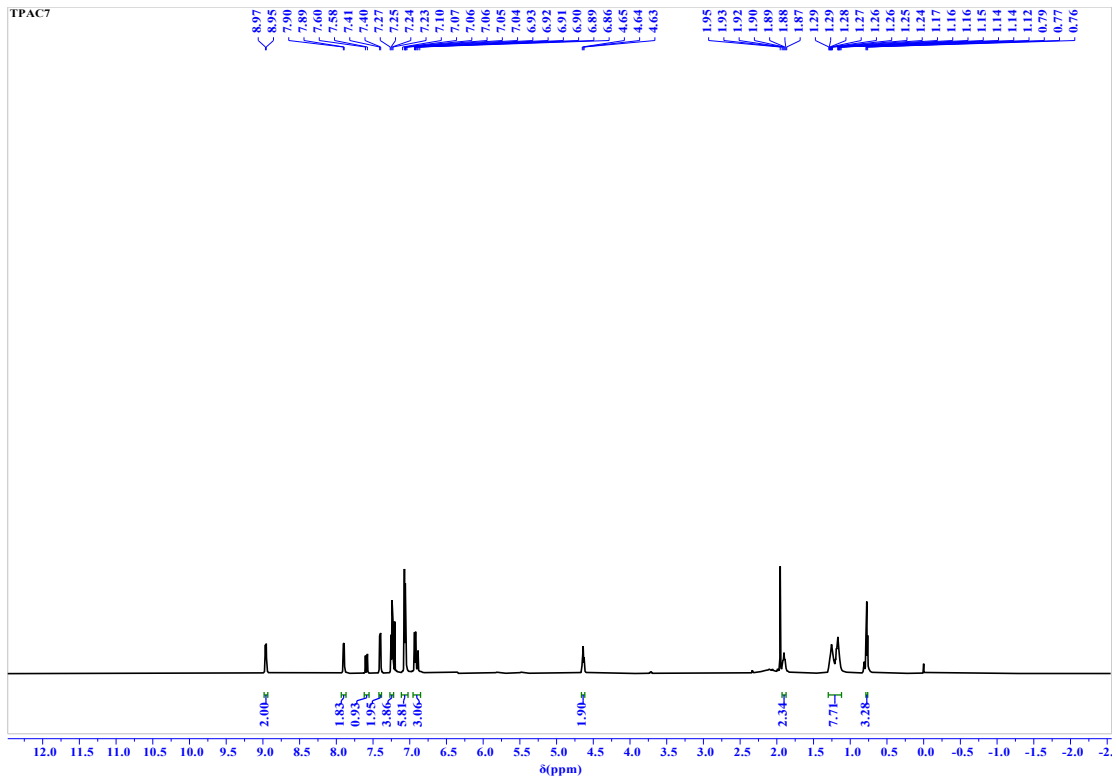

$^1\text{H}$  NMR spectra of TPA-P-7

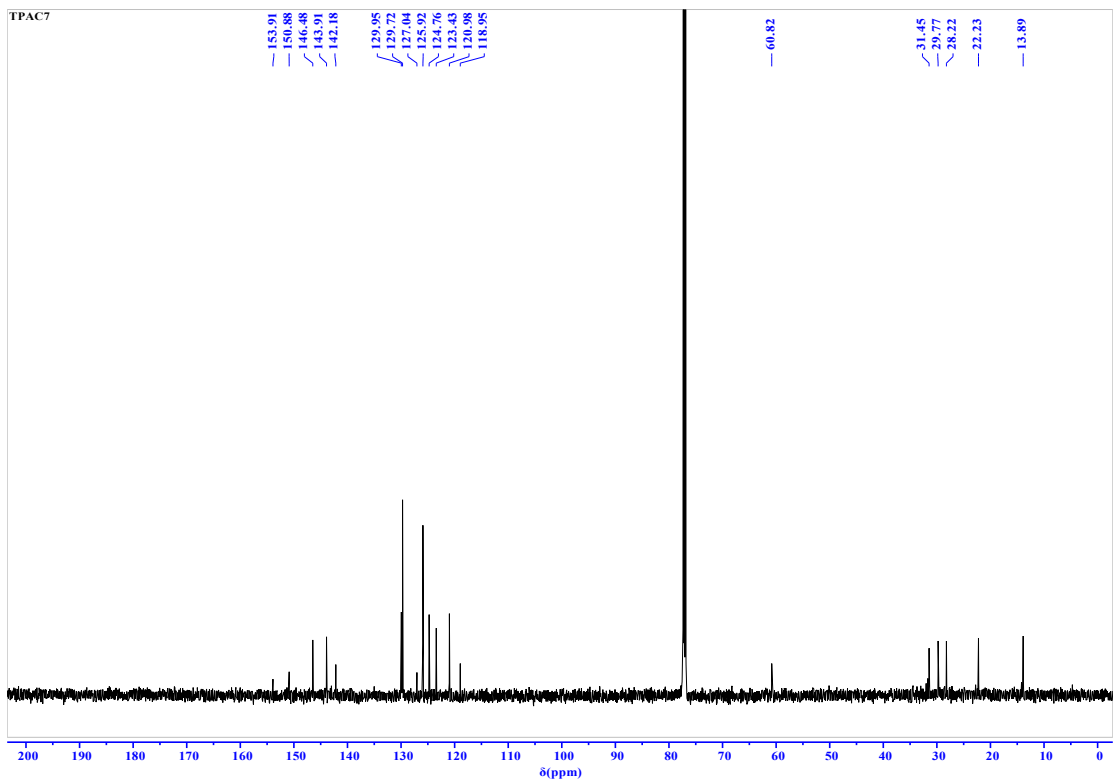

$^{13}\text{C}$  NMR spectra of TPA-P-7

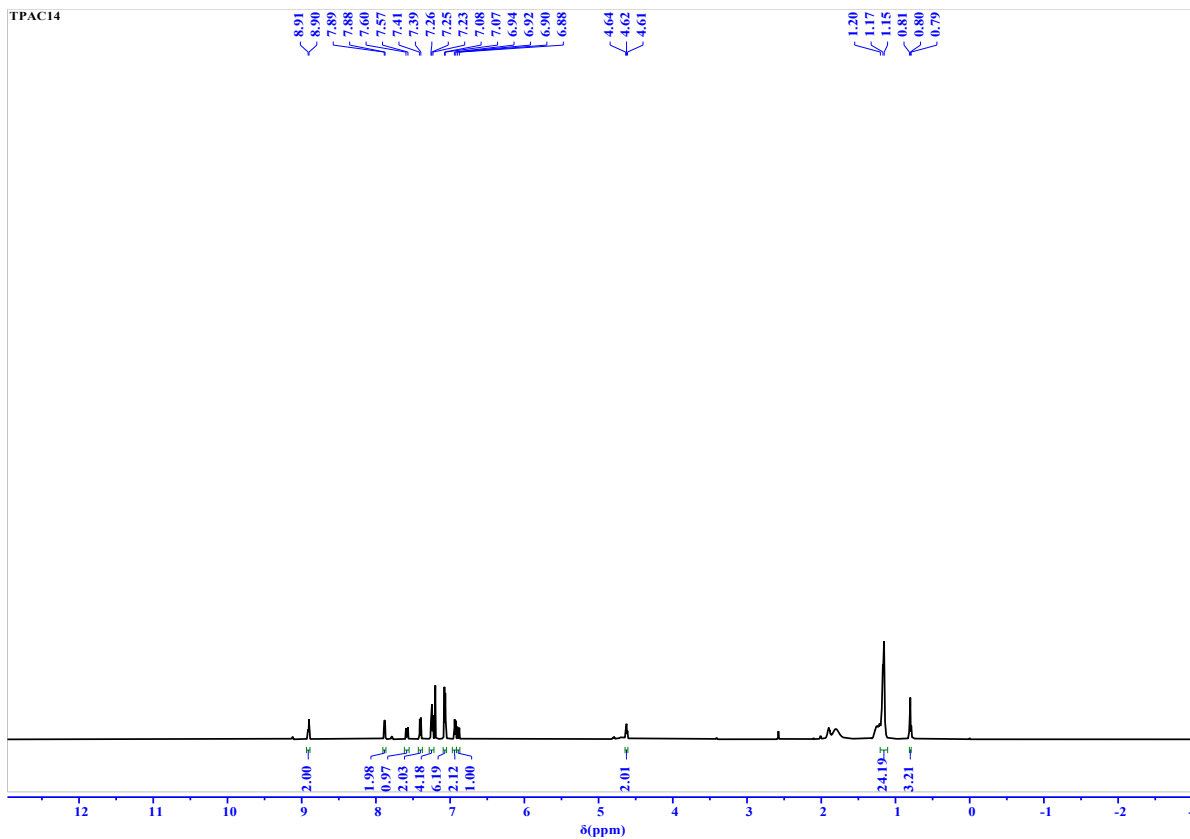

<sup>1</sup>H NMR spectra of TPA-P-14

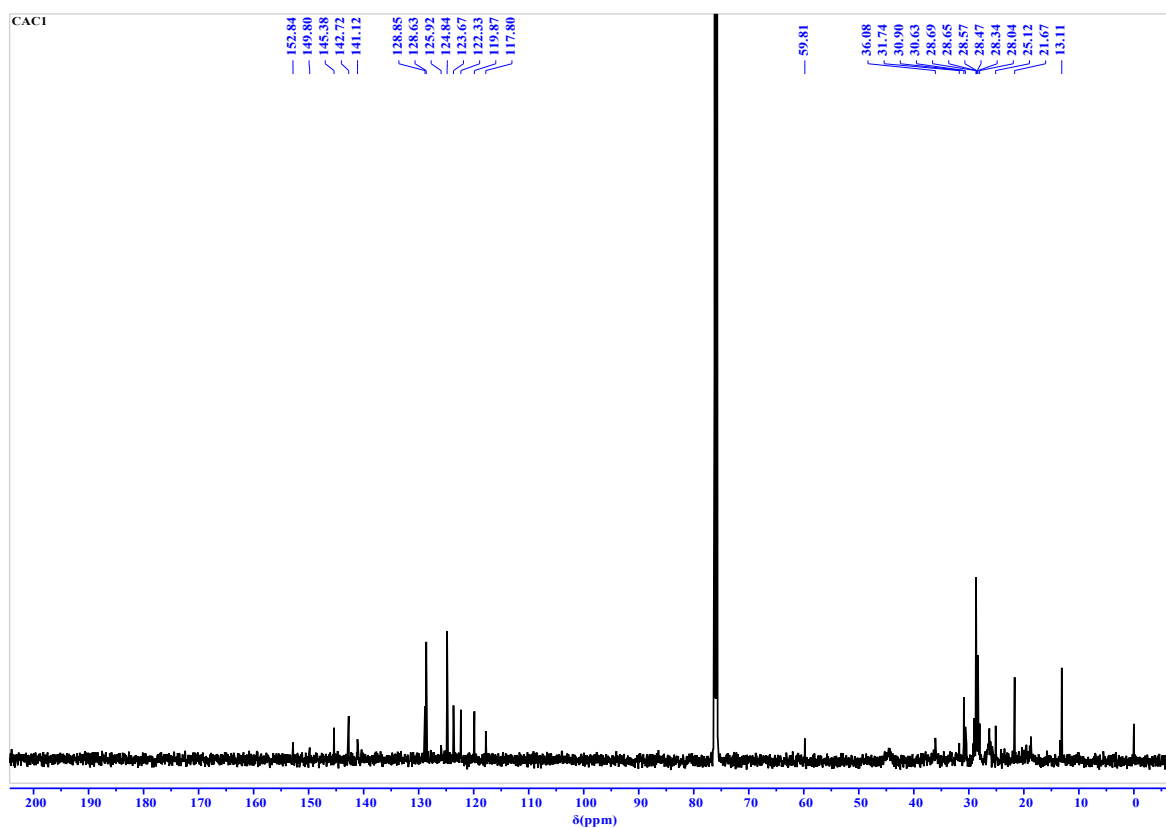

<sup>13</sup>C NMR spectra of TPA-P-14

Table S1. Crystallographic data of **TPA-P-1 I** (CCDC No. 2353725).

|                                   |                                                  |               |
|-----------------------------------|--------------------------------------------------|---------------|
| Empirical formula                 | C <sub>26</sub> H <sub>23</sub> I N <sub>2</sub> |               |
| Formula weight                    | 490.36                                           |               |
| Temperature                       | 220(2) K                                         |               |
| Wavelength                        | 0.700 Å                                          |               |
| Crystal system                    | Triclinic                                        |               |
| Space group                       | P-1                                              |               |
| Unit cell dimensions              | a = 11.679(2) Å                                  | a = 76.14(3)° |
|                                   | b = 17.758(4) Å                                  | b = 82.02(3)° |
|                                   | c = 23.966(5) Å                                  | g = 71.88(3)° |
| Volume                            | 4575.3(19) Å <sup>3</sup>                        |               |
| Z                                 | 8                                                |               |
| Density (calculated)              | 1.424 Mg/m <sup>3</sup>                          |               |
| Absorption coefficient            | 1.340 mm <sup>-1</sup>                           |               |
| F(000)                            | 1968                                             |               |
| Crystal size                      | 0.039 x 0.011 x 0.009 mm <sup>3</sup>            |               |
| Theta range for data collection   | 1.811 to 24.999°.                                |               |
| Index ranges                      | -14<=h<=14, -21<=k<=21, -28<=l<=28               |               |
| Reflections collected             | 32943                                            |               |
| Independent reflections           | 16669 [R(int) = 0.0392]                          |               |
| Completeness to theta = 24.835°   | 98.8 %                                           |               |
| Absorption correction             | Empirical                                        |               |
| Max. and min. transmission        | 1.000 and 0.645                                  |               |
| Refinement method                 | Full-matrix least-squares on F <sup>2</sup>      |               |
| Data / restraints / parameters    | 16669 / 20 / 1088                                |               |
| Goodness-of-fit on F <sup>2</sup> | 0.996                                            |               |
| Final R indices [I>2sigma(I)]     | R1 = 0.0666, wR2 = 0.2003                        |               |
| R indices (all data)              | R1 = 0.0965, wR2 = 0.2192                        |               |
| Extinction coefficient            | 0.0013(2)                                        |               |
| Largest diff. peak and hole       | 1.156 and -0.963 e·Å <sup>-3</sup>               |               |

Table S2. Crystallographic data of **TPA-P-1** IOTs (CCDC No. 2353726).

|                                   |                                                                   |                |
|-----------------------------------|-------------------------------------------------------------------|----------------|
| Empirical formula                 | C <sub>59</sub> H <sub>53</sub> I N <sub>4</sub> O <sub>3</sub> S |                |
| Formula weight                    | 1025.01                                                           |                |
| Temperature                       | 220(2) K                                                          |                |
| Wavelength                        | 0.630 Å                                                           |                |
| Crystal system                    | Triclinic                                                         |                |
| Space group                       | P-1                                                               |                |
| Unit cell dimensions              | a = 9.3240(19) Å                                                  | a = 95.64(3)°. |
|                                   | b = 10.641(2) Å                                                   | b = 98.83(3)°. |
|                                   | c = 26.345(5) Å                                                   | g = 99.25(3)°. |
| Volume                            | 2529.0(9) Å <sup>3</sup>                                          |                |
| Z                                 | 2                                                                 |                |
| Density (calculated)              | 1.346 Mg/m <sup>3</sup>                                           |                |
| Absorption coefficient            | 0.520 mm <sup>-1</sup>                                            |                |
| F(000)                            | 1056                                                              |                |
| Crystal size                      | 0.075 x 0.011 x 0.009 mm <sup>3</sup>                             |                |
| Theta range for data collection   | 1.398 to 25.000°.                                                 |                |
| Index ranges                      | -12<=h<=12, -14<=k<=14, -35<=l<=35                                |                |
| Reflections collected             | 25033                                                             |                |
| Independent reflections           | 12642 [R(int) = 0.0227]                                           |                |
| Completeness to theta = 22.210°   | 99.1 %                                                            |                |
| Absorption correction             | Empirical                                                         |                |
| Max. and min. transmission        | 1.000 and 0.819                                                   |                |
| Refinement method                 | Full-matrix least-squares on F <sup>2</sup>                       |                |
| Data / restraints / parameters    | 12642 / 372 / 635                                                 |                |
| Goodness-of-fit on F <sup>2</sup> | 1.097                                                             |                |
| Final R indices [I>2sigma(I)]     | R1 = 0.0703, wR2 = 0.2030                                         |                |
| R indices (all data)              | R1 = 0.1041, wR2 = 0.2215                                         |                |
| Extinction coefficient            | n/a                                                               |                |
| Largest diff. peak and hole       | 1.402 and -1.086 e.Å <sup>-3</sup>                                |                |

Table S3. Crystallographic data of **TPA-P-1** (CCDC No. 2353727).

|                                   |                                                                  |                 |
|-----------------------------------|------------------------------------------------------------------|-----------------|
| Identification code               | SPA853                                                           |                 |
| Empirical formula                 | C <sub>26</sub> H <sub>23</sub> Cl N <sub>2</sub> O <sub>4</sub> |                 |
| Formula weight                    | 462.91                                                           |                 |
| Temperature                       | 220(2) K                                                         |                 |
| Wavelength                        | 0.630 Å                                                          |                 |
| Crystal system                    | Monoclinic                                                       |                 |
| Space group                       | P2 <sub>1</sub> /c                                               |                 |
| Unit cell dimensions              | a = 11.327(2) Å                                                  | a = 90°.        |
|                                   | b = 20.280(4) Å                                                  | b = 109.77(3)°. |
|                                   | c = 10.453(2) Å                                                  | g = 90°.        |
| Volume                            | 2259.7(9) Å <sup>3</sup>                                         |                 |
| Z                                 | 4                                                                |                 |
| Density (calculated)              | 1.361 Mg/m <sup>3</sup>                                          |                 |
| Absorption coefficient            | 0.150 mm <sup>-1</sup>                                           |                 |
| F(000)                            | 968                                                              |                 |
| Crystal size                      | 0.045 x 0.027 x 0.012 mm <sup>3</sup>                            |                 |
| Theta range for data collection   | 1.693 to 24.997°.                                                |                 |
| Index ranges                      | -15 ≤ h ≤ 15, -27 ≤ k ≤ 27, -13 ≤ l ≤ 12                         |                 |
| Reflections collected             | 21162                                                            |                 |
| Independent reflections           | 5403 [R(int) = 0.0411]                                           |                 |
| Completeness to theta = 22.210°   | 95.6 %                                                           |                 |
| Absorption correction             | Empirical                                                        |                 |
| Max. and min. transmission        | 1.000 and 0.812                                                  |                 |
| Refinement method                 | Full-matrix least-squares on F <sup>2</sup>                      |                 |
| Data / restraints / parameters    | 5403 / 0 / 299                                                   |                 |
| Goodness-of-fit on F <sup>2</sup> | 1.073                                                            |                 |
| Final R indices [I > 2σ(I)]       | R1 = 0.0573, wR2 = 0.1596                                        |                 |
| R indices (all data)              | R1 = 0.0831, wR2 = 0.1710                                        |                 |
| Extinction coefficient            | n/a                                                              |                 |
| Largest diff. peak and hole       | 1.015 and -0.407 e.Å <sup>-3</sup>                               |                 |

Table S4. Crystallographic data of **TPA-P-14** ClO<sub>4</sub> (CCDC No. 2353728).

|                                   |                                                                                |                 |
|-----------------------------------|--------------------------------------------------------------------------------|-----------------|
| Empirical formula                 | C <sub>78</sub> H <sub>100</sub> Cl <sub>2</sub> N <sub>4</sub> O <sub>9</sub> |                 |
| Formula weight                    | 1308.51                                                                        |                 |
| Temperature                       | 220(2) K                                                                       |                 |
| Wavelength                        | 0.630 Å                                                                        |                 |
| Crystal system                    | Triclinic                                                                      |                 |
| Space group                       | P-1                                                                            |                 |
| Unit cell dimensions              | a = 8.8910(18) Å                                                               | a = 93.24(3)°.  |
|                                   | b = 11.629(2) Å                                                                | b = 91.19(3)°.  |
|                                   | c = 36.418(7) Å                                                                | g = 102.33(3)°. |
| Volume                            | 3670.5(13) Å <sup>3</sup>                                                      |                 |
| Z                                 | 2                                                                              |                 |
| Density (calculated)              | 1.184 Mg/m <sup>3</sup>                                                        |                 |
| Absorption coefficient            | 0.108 mm <sup>-1</sup>                                                         |                 |
| F(000)                            | 1404                                                                           |                 |
| Crystal size                      | 0.079 x 0.069 x 0.022 mm <sup>3</sup>                                          |                 |
| Theta range for data collection   | 1.490 to 25.000°.                                                              |                 |
| Index ranges                      | -11 ≤ h ≤ 11, -15 ≤ k ≤ 15, -48 ≤ l ≤ 48                                       |                 |
| Reflections collected             | 34604                                                                          |                 |
| Independent reflections           | 17488 [R(int) = 0.0213]                                                        |                 |
| Completeness to theta = 22.210°   | 95.2 %                                                                         |                 |
| Absorption correction             | Empirical                                                                      |                 |
| Max. and min. transmission        | 1.000 and 0.816                                                                |                 |
| Refinement method                 | Full-matrix least-squares on F <sup>2</sup>                                    |                 |
| Data / restraints / parameters    | 17488 / 27 / 845                                                               |                 |
| Goodness-of-fit on F <sup>2</sup> | 1.201                                                                          |                 |
| Final R indices [I > 2σ(I)]       | R1 = 0.1016, wR2 = 0.3220                                                      |                 |
| R indices (all data)              | R1 = 0.1500, wR2 = 0.3580                                                      |                 |
| Extinction coefficient            | 0.0033(16)                                                                     |                 |
| Largest diff. peak and hole       | 1.085 and -0.782 e.Å <sup>-3</sup>                                             |                 |



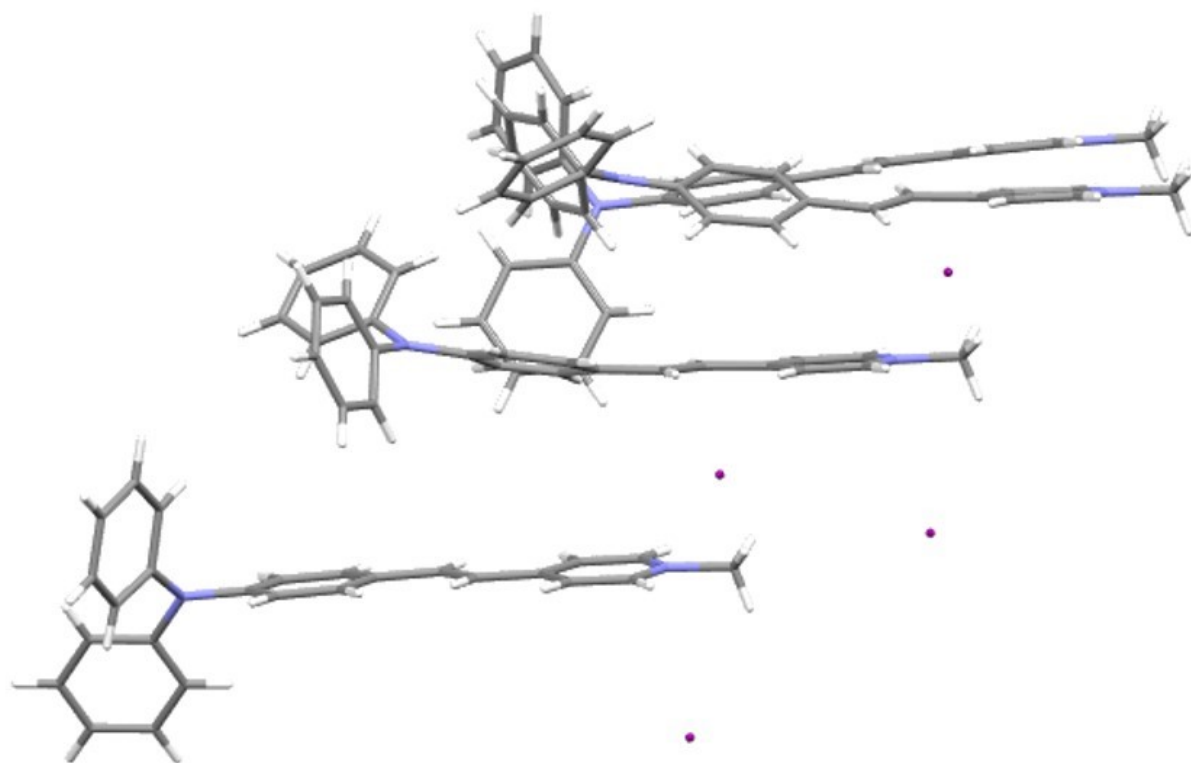

Fig. S1. Molecular structure of **TPA-P-1 I** in the asymmetric unit.

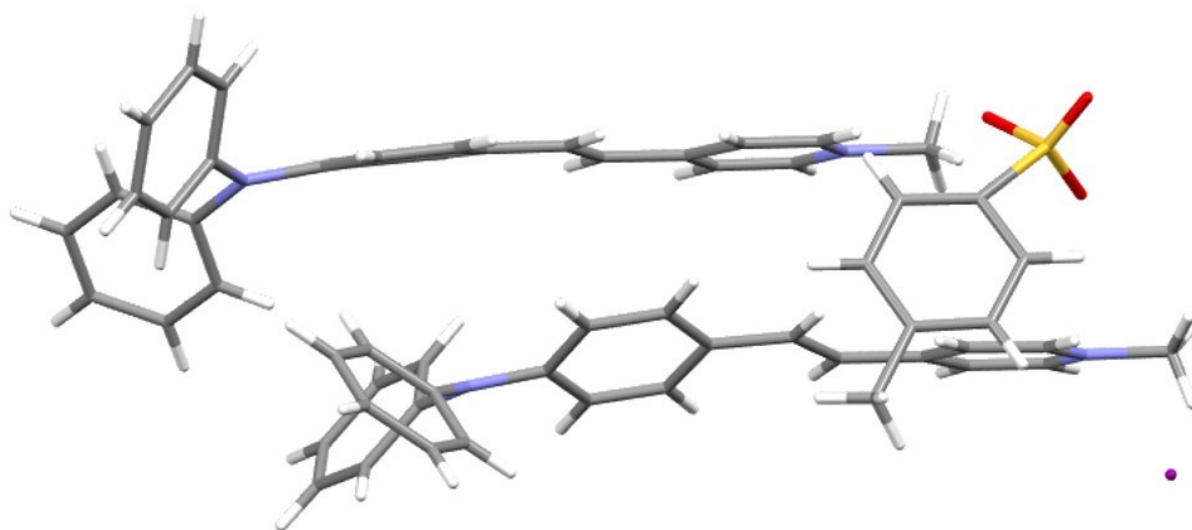

Fig. S2. Molecular structure of **TPA-P-1 OTs** in the asymmetric unit.

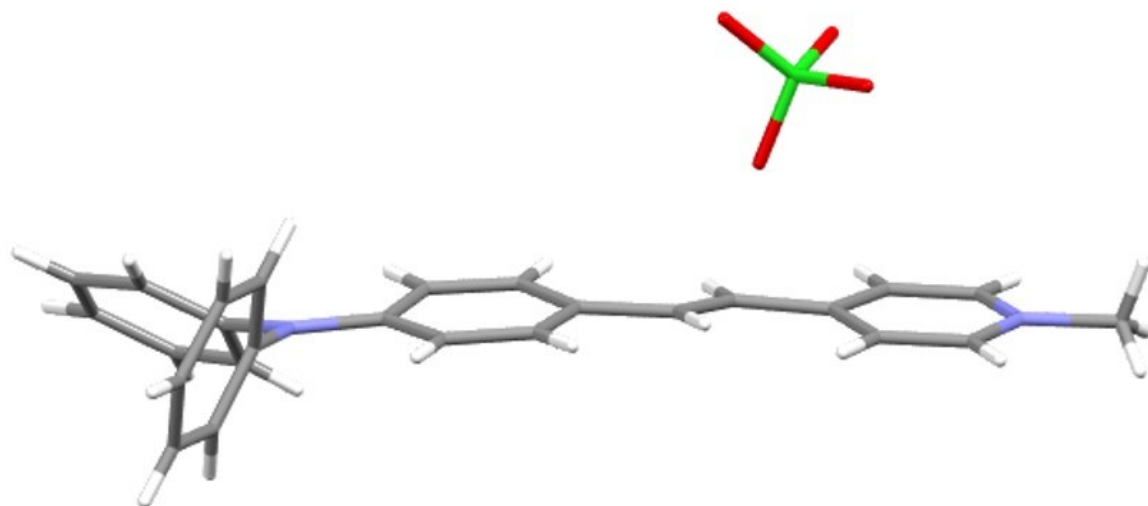

Fig. S3. Molecular structure of **TPA-P-1** ClO<sub>4</sub> in the asymmetric unit.

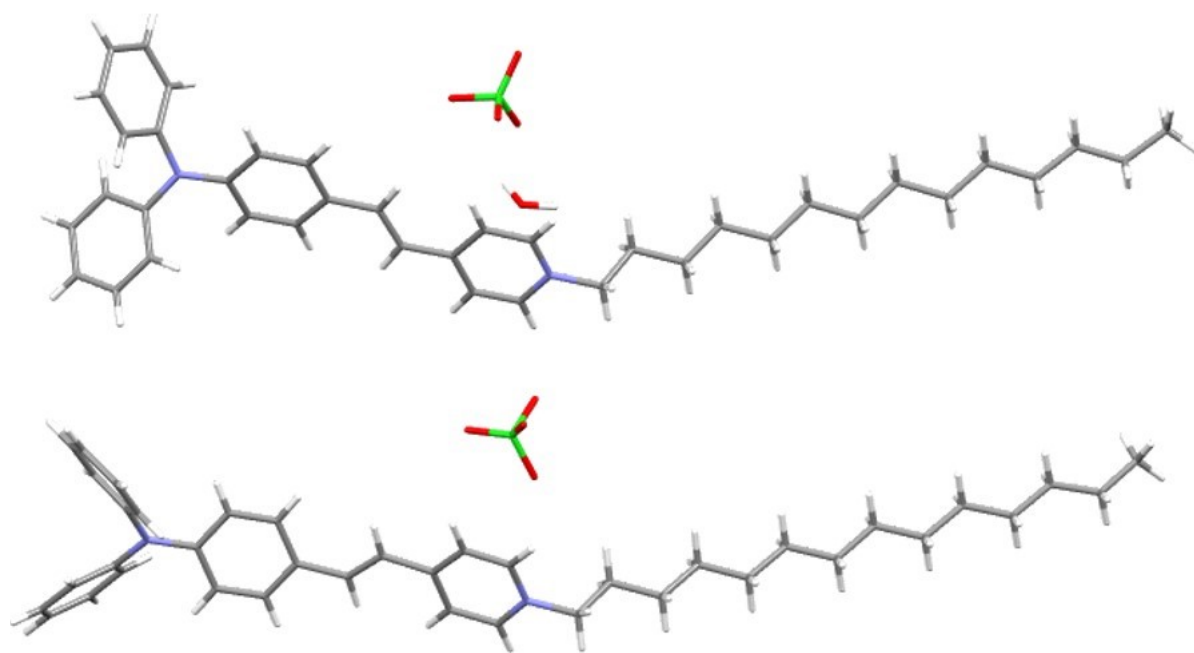

Fig. S4. Molecular structure of **TPA-P-14** ClO<sub>4</sub> in the asymmetric unit.

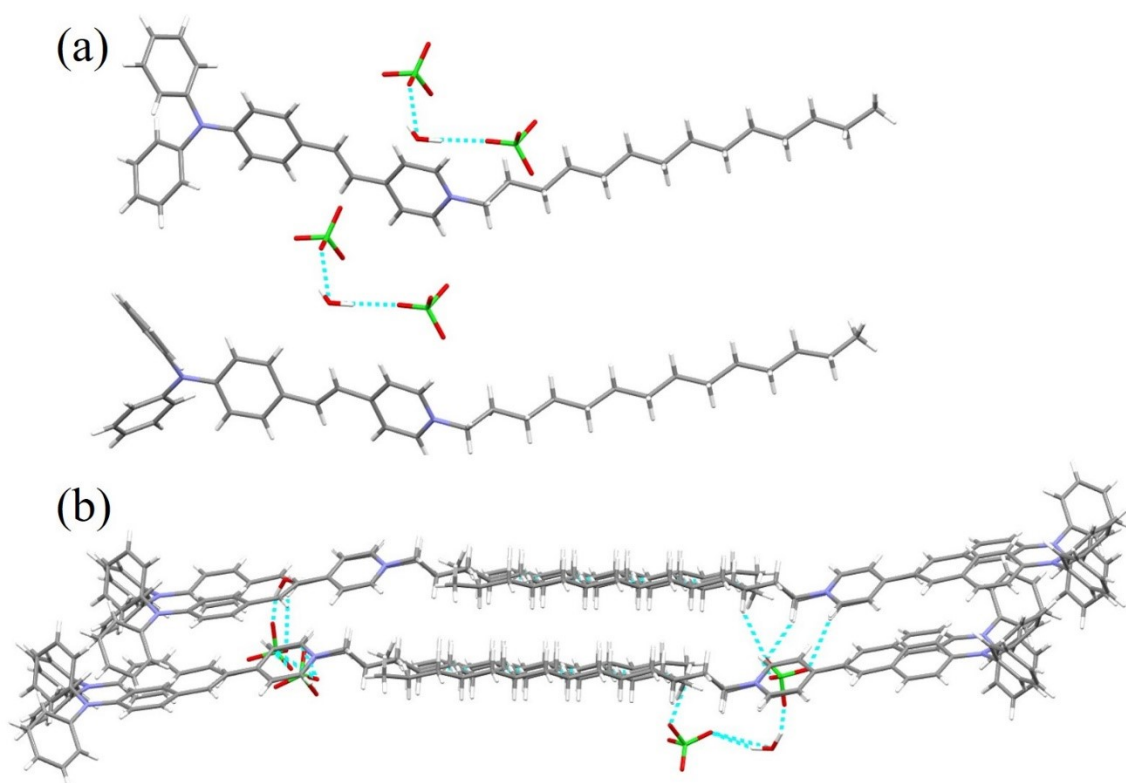

Fig. S5. Intermolecular interactions in the crystal lattice of **TPA-P-14**  $\text{ClO}_4$ . (a) The H-bonding distance ( $d_{\text{D-H}\dots\text{A}}$ ) between water and perchlorate is ranged between 2.938-2.997 Å. (b) The H-bonding distance ( $d_{\text{D-H}\dots\text{A}}$ ) between pyridyl hydrogen and perchlorate is ranged between 2.913-3.090 Å.

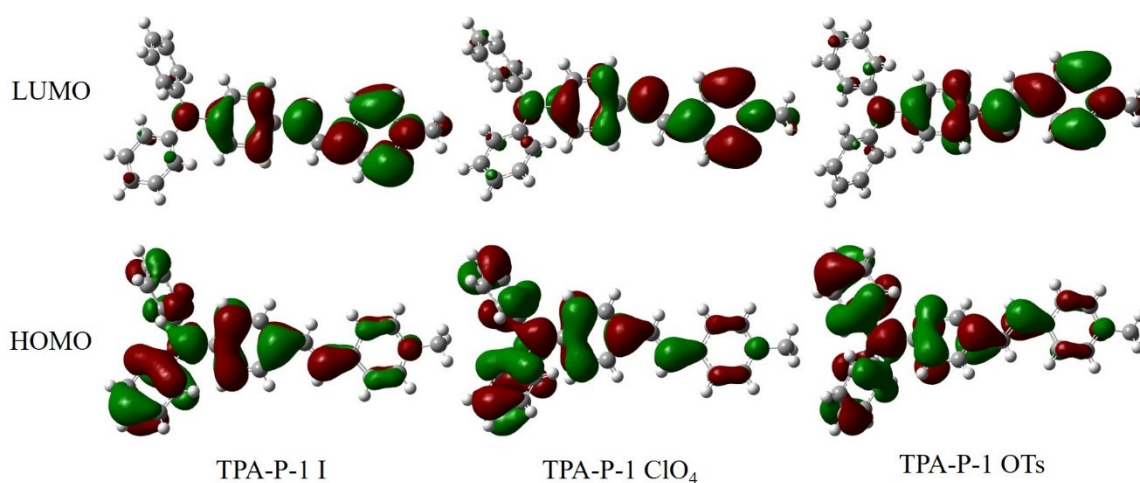

Fig. S6. HOMO-LUMO of **TPA-P-1** derived from different crystals.

Table S5. Calculated optical band of **TPA-P-1** structure obtained from the crystal structure.

| Compound                 | HOMO  | LUMO  | band gap(eV) |
|--------------------------|-------|-------|--------------|
| TPA-P-1 I                | -7.61 | -5.61 | 2.00         |
| TPA-P-1 ClO <sub>4</sub> | -7.60 | -5.61 | 1.99         |
| TPA-P-1 OTs              | -7.60 | -5.62 | 1.98         |

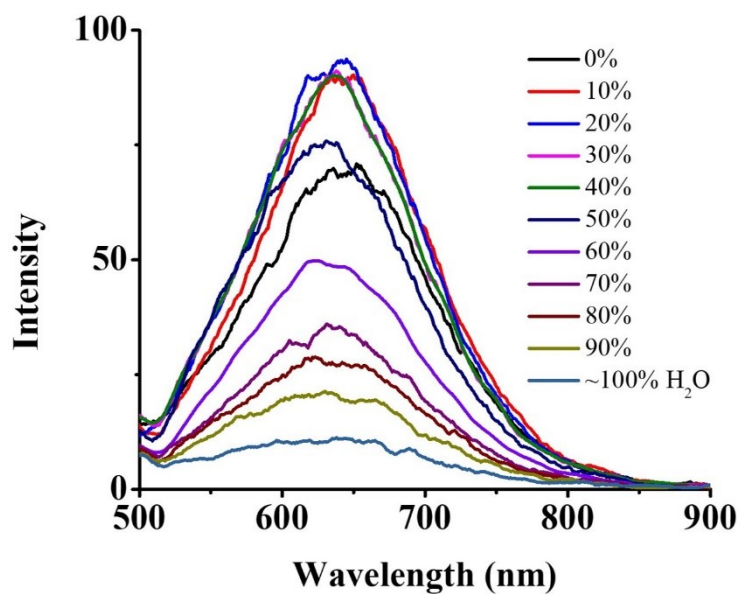

Fig. S7. AIE of TPA-P-1 I in DMSO: water mixture.

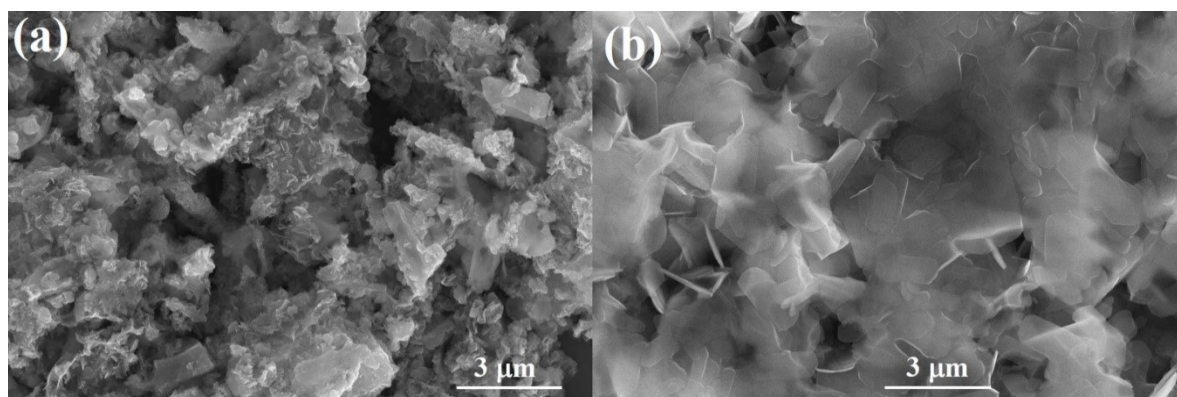

Fig. S8. FE-SEM images of (a) TPA-P-7 and (b) TPA-P-14 aggregates formed at  $\approx$ 100% water.

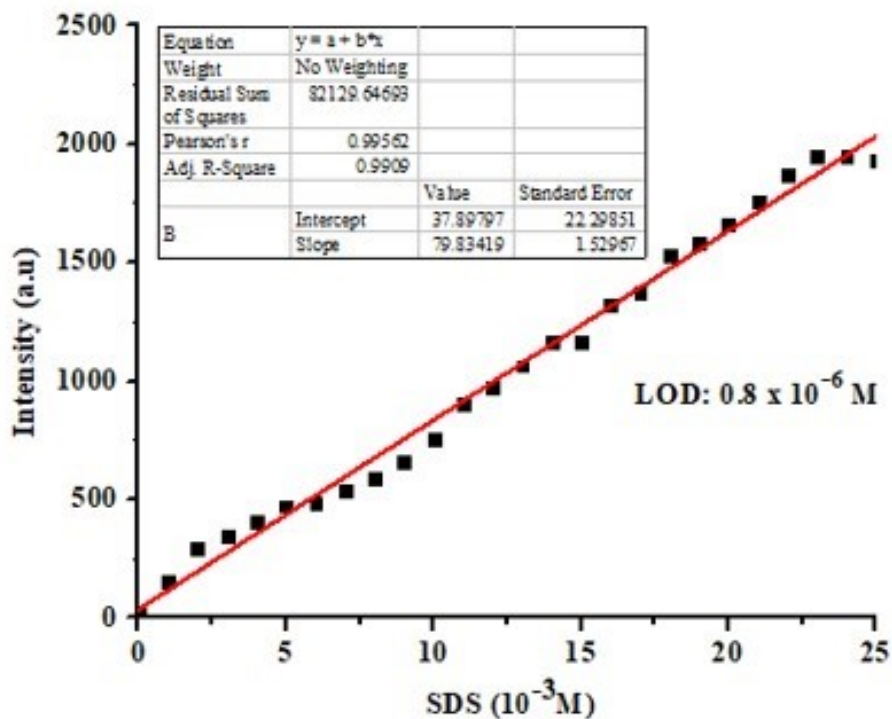

Fig. S9. Concentration dependent fluorescence of TPA-P-1 I with SDS and LOD analysis.

Table S6. Percent (%) molecular orbital contribution of the HOMO and LUMO of the TPA-P-1 at the B3LYP/6-31+G(d,p) Level

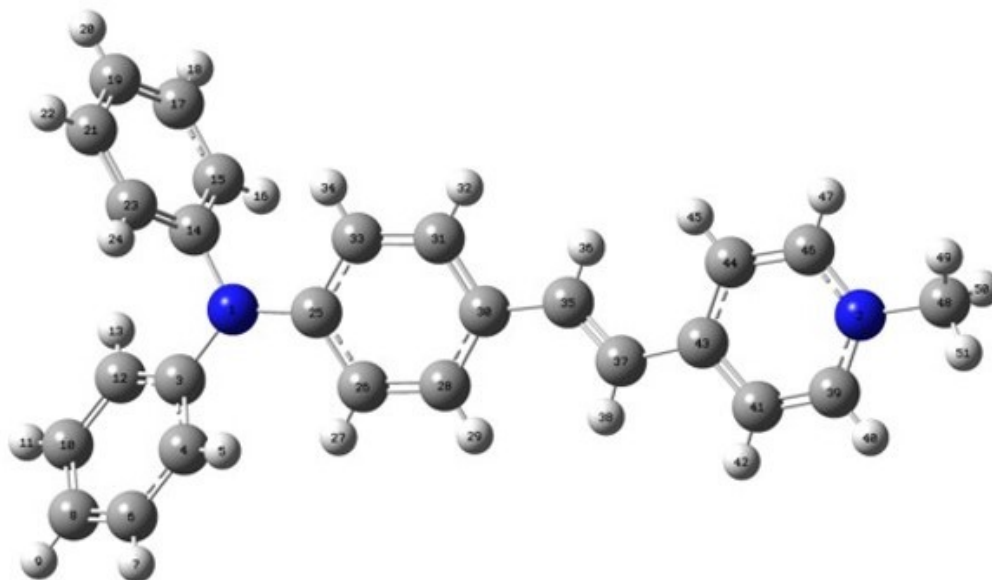

|  | E(eV) | Band gap (eV) | Fragment 1 (atom 1 to atom 34) % | Fragment 2 (atom 35 to atom 51) % |
|--|-------|---------------|----------------------------------|-----------------------------------|
|--|-------|---------------|----------------------------------|-----------------------------------|

|      |       |      |    |    |
|------|-------|------|----|----|
| HOMO | -7.61 | 2.00 | 80 | 20 |
| LUMO | -6.61 |      | 39 | 61 |

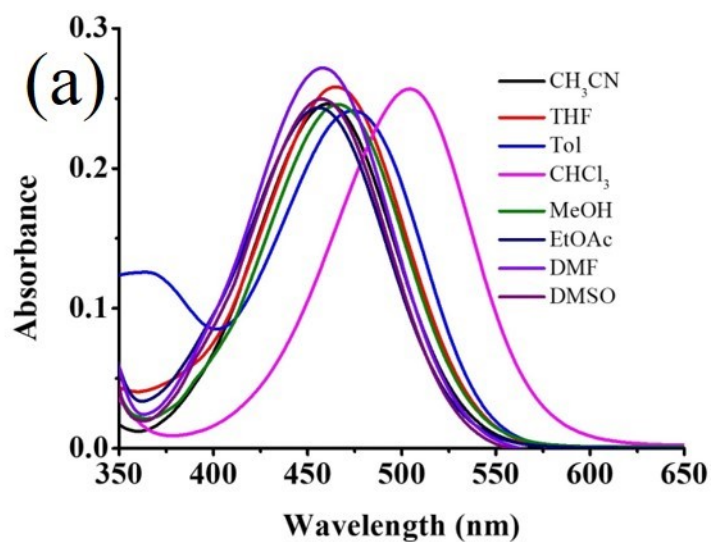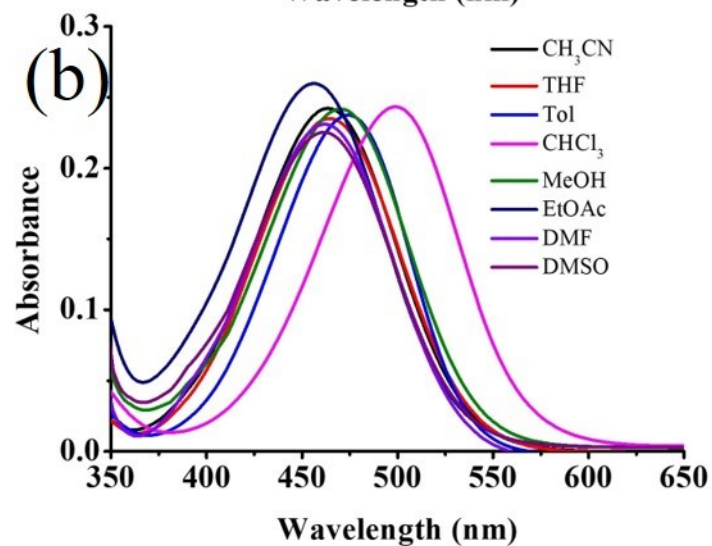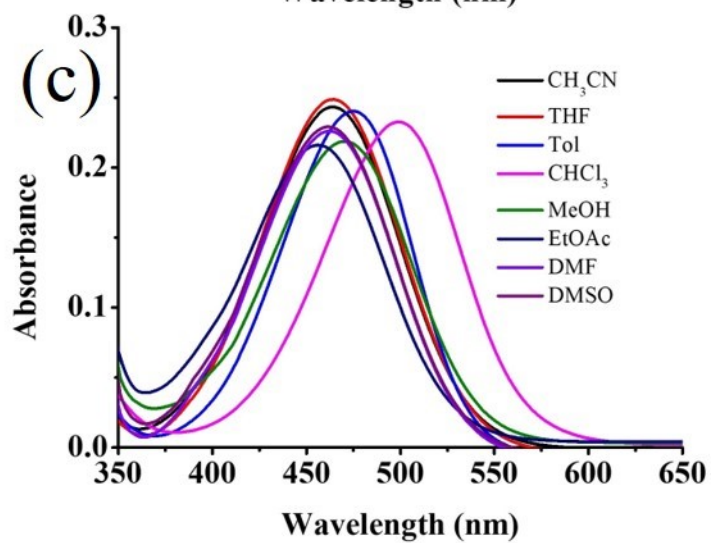



Fig. S10. Absorption spectra of (a) TPA-P-1 I, (b) TPA-P-7 Br and (c) TPA-P-14 Br in different solvents.

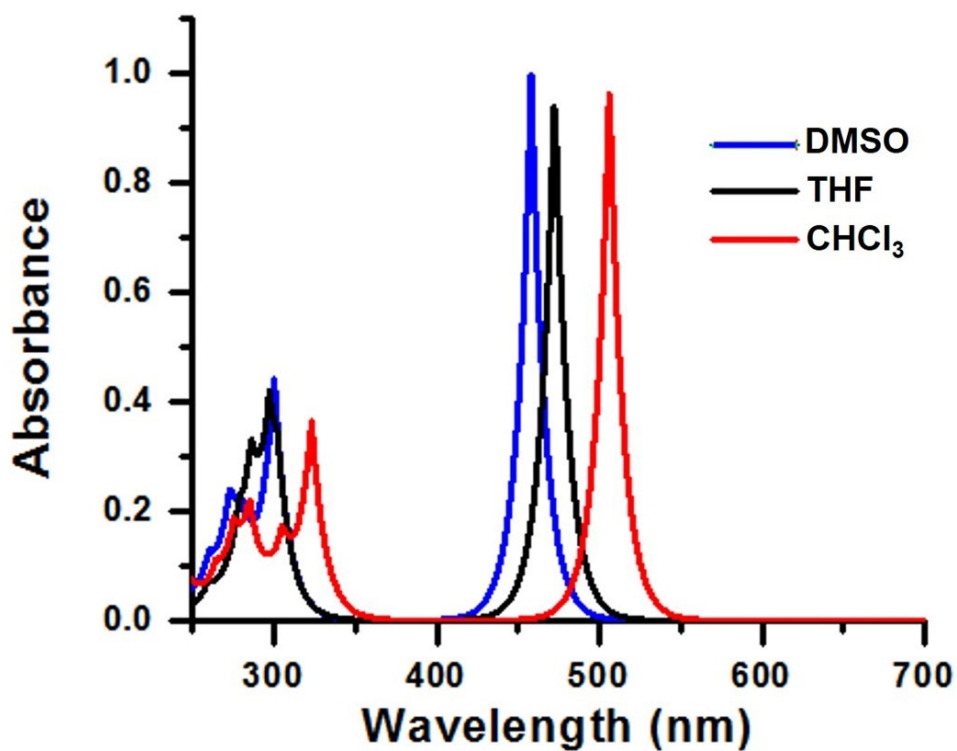

Fig. S11. Simulated absorption spectra of TPA-P-1 in CHCl<sub>3</sub>, THF and DMSO.

Table S7. Comparison of simulated absorption and experimental absorption of TPA-P-1.

| Solvent           | Experimental ( $\lambda_{\text{abs}}$ ) nm | Theoretical ( $\lambda_{\text{abs}}$ ) nm |
|-------------------|--------------------------------------------|-------------------------------------------|
| DMSO              | 456                                        | 458                                       |
| THF               | 467                                        | 473                                       |
| CHCl <sub>3</sub> | 508                                        | 516                                       |

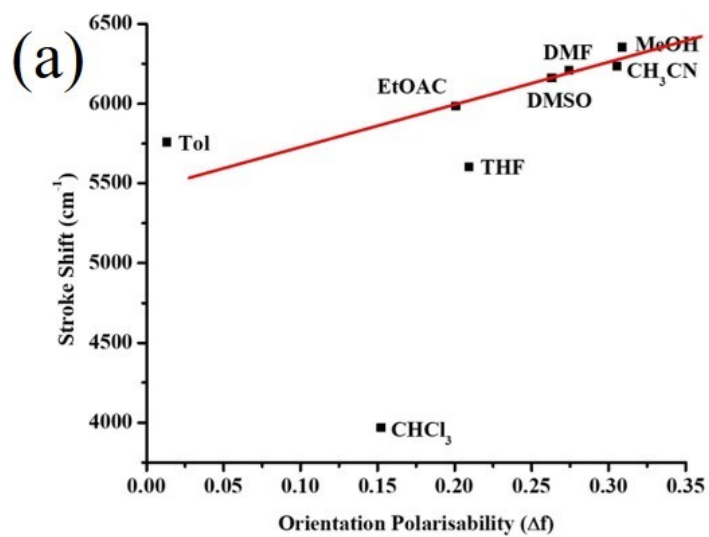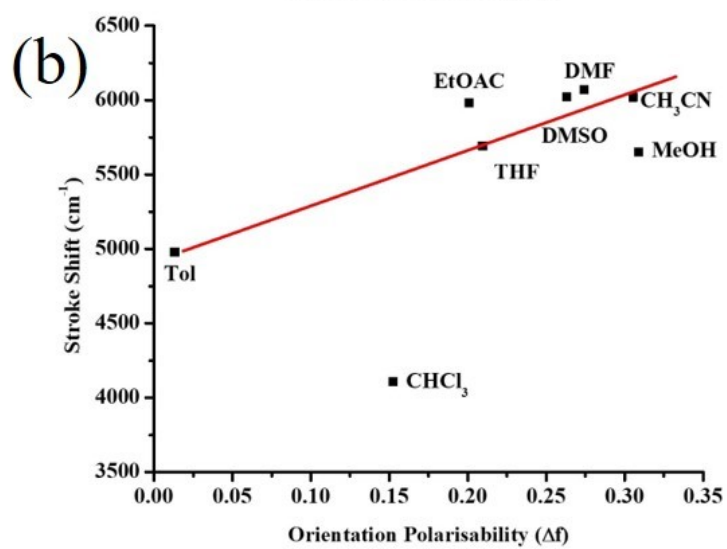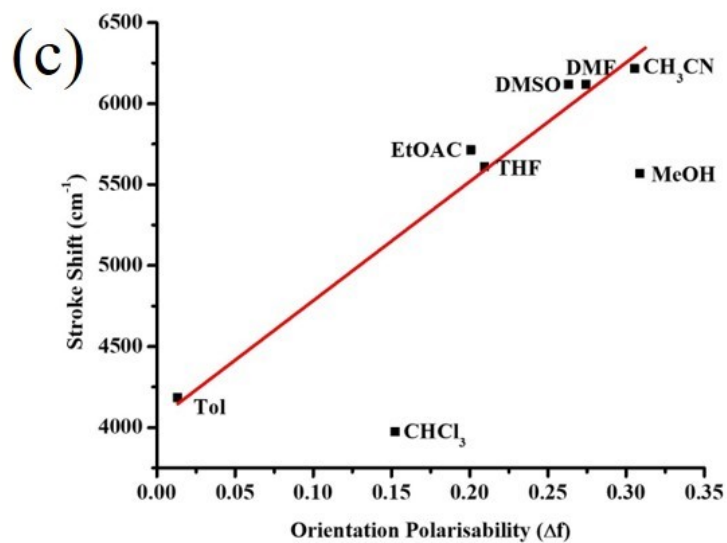



Fig. S12. Linear correlation of the orientation polarization ( $f$ ) of solvent with Stokes shift ( $\nu_a - \nu_f$ ) for (a) TPA-P-1, (b) TPA-P-7 and (c) TPA-P-14.

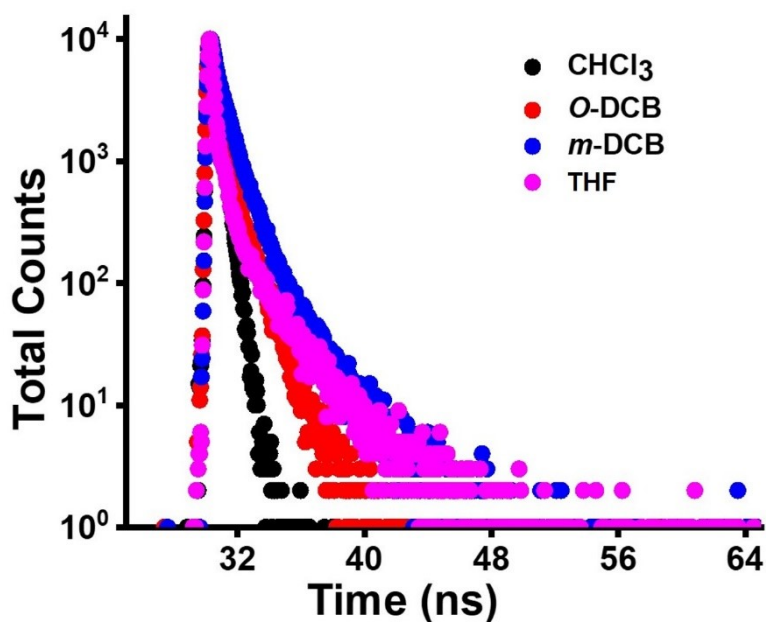

Fig. S13. Excited state decay profiles of TPA-P-1 in CHCl<sub>3</sub>, THF and DMSO.

| Solvent           | B <sub>1</sub> | B <sub>2</sub> | $\tau_1$ | $\tau_2$ | $\langle \tau \rangle$ (ns) | $\chi^2$ |
|-------------------|----------------|----------------|----------|----------|-----------------------------|----------|
| CHCl <sub>3</sub> | 0.65           | 0.35           | 0.079    | 0.383    | 0.298                       | 0.78     |
| O-DCB             | 0.86           | 0.14           | 0.226    | 1.012    | 0.557                       | 0.85     |
| m-DCB             | 0.83           | 0.17           | 0.525    | 1.559    | 0.916                       | 1.03     |
| THF               | 0.98           | 0.02           | 0.172    | 1.838    | 0.470                       | 0.97     |

Table S8. Shows the  $\chi^2$  value and fluorescence life

time decay of TPA-P-1 in CHCl<sub>3</sub>, O-DCB, m-DCB, THF respectively in solution state, B<sub>1</sub>, B<sub>2</sub> are relative individual component contributions to  $\tau_1, \tau_2$   $\langle \tau \rangle$  (ns) is the average lifetime from multiple decay profiles.

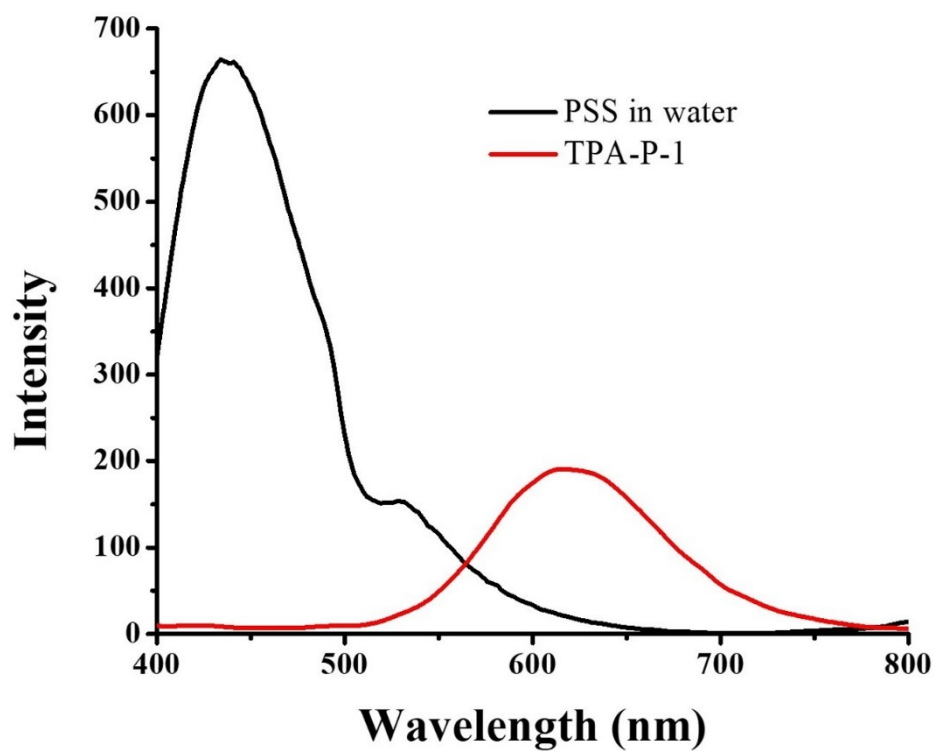

Fig. S14. Fluorescence spectra of PSS and TPA-P-1 I in water.

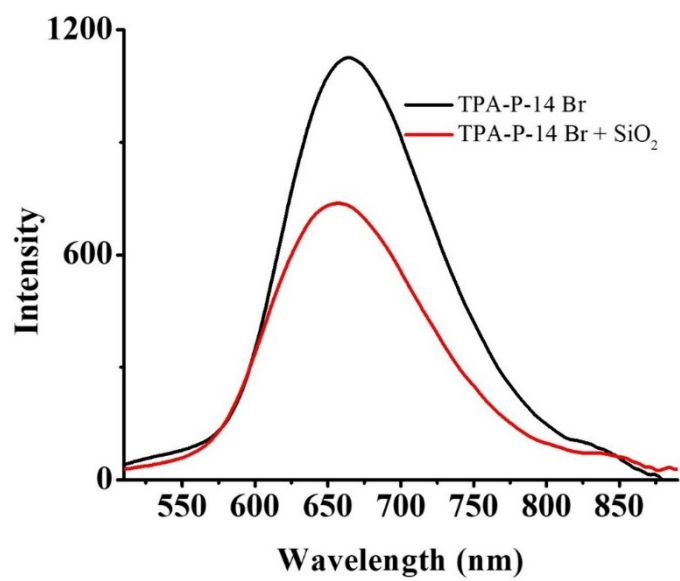

Fig. S15. Fluorescence spectra of TPA-P-1 I before and after integrating with SiO<sub>2</sub>.

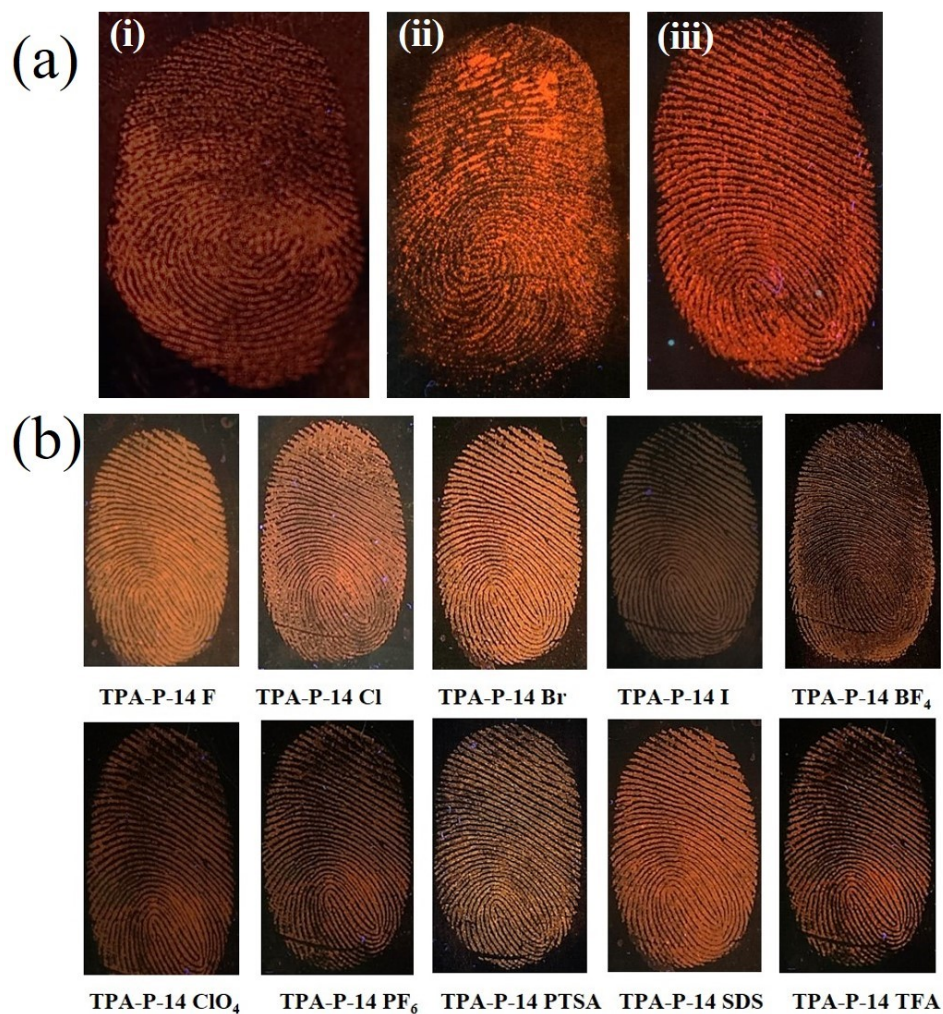

Fig. S16. LFPs imaging using (a) **TPA-P-1 I** (i), **TPA-P-7 Br** (ii) and **TPA-P-14 Br** (iii) and (b) **TPA-P-14** with different anions. Fig. S16a (iii) and Fig. 6c (i) are same images. The duplicate image of **TPA-P-14 Br** was used in Figure S16a (iii) to compare the image quality with the one obtained using **TPA-P-1 I** and **TPA-P-7 Br**.
